# Supplementary material for: Remarkable Single Atom Catalyst of Transition Metal (Fe, Co & Ni) Doped on C2N Surface for Hydrogen Dissociation Reaction
Source: MDPI journal article supplement (doi:10.3390/nano13010029), 2022-12-21
Supplement: s1 [file s1]

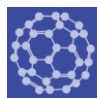

Supplementary Materials

# Remarkable Single Atom Catalyst of Transition Metal (Fe, Co & Ni) Doped on C<sub>2</sub>N Surface for Hydrogen Dissociation Reaction

Ahmed Bilal Shah <sup>1</sup>, Sehrish Sarfaraz <sup>1</sup>, Muhammad Yar <sup>1</sup>, Nadeem S. Sheikh <sup>2</sup>, Hassan H. Hammud <sup>3,\*</sup> and Khurshid Ayub <sup>1,\*</sup>

<sup>1</sup> Department of Chemistry, COMSATS University Islamabad, Abbottabad Campus, Abbottabad 22060, Pakistan

<sup>2</sup> Chemical Sciences, Faculty of Science, Universiti Brunei Darussalam, Jalan Tungku Link, Gadong BE1410, Brunei

<sup>3</sup> Department of Chemistry, College of Science, King Faisal University, Al-Ahsa 31982, Saudi Arabia

\* Correspondence: hhammoud@kfu.edu.sa (H.H.H.); khurshid@cuiatd.edu.pk (K.A.)

**Co@C<sub>2</sub>N**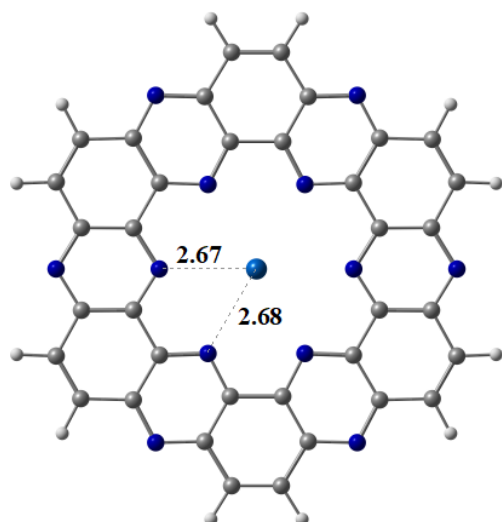**Doublet**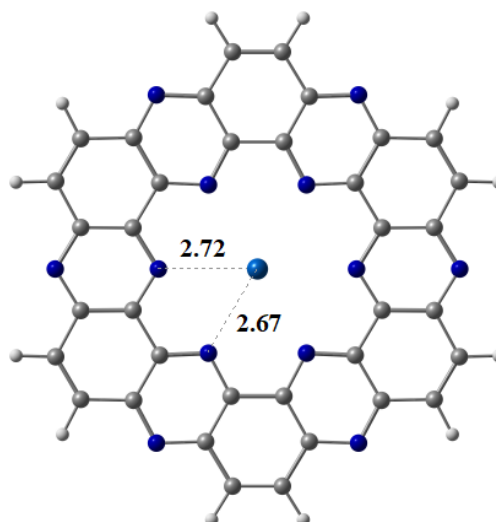**Quartet**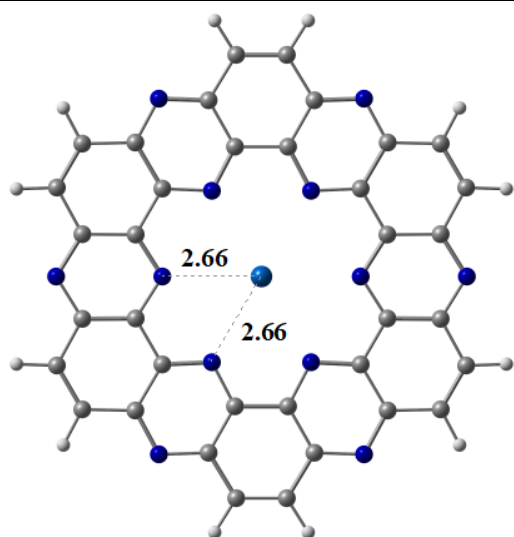**Sextet**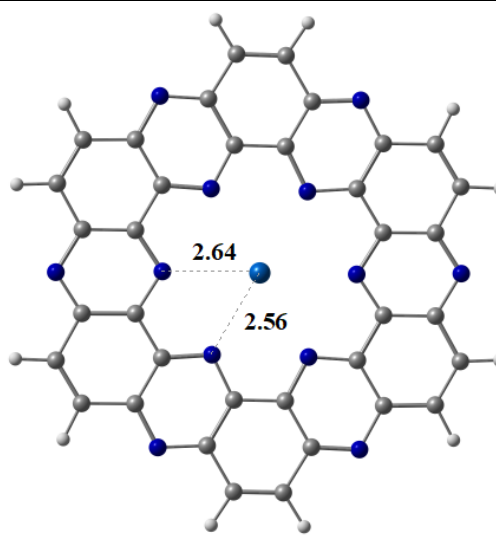**Octet****Fe@C<sub>2</sub>N**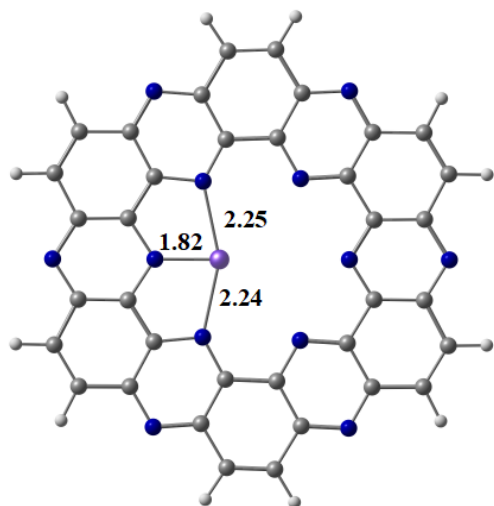**Singlet**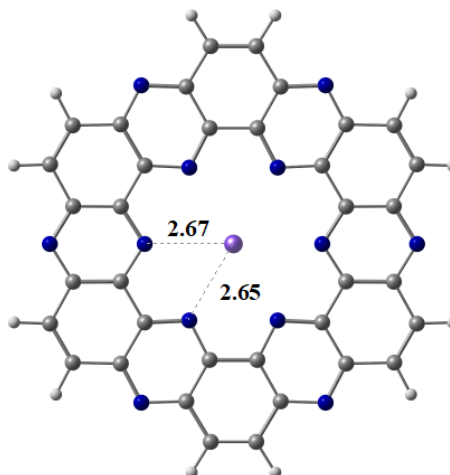**Triplet**

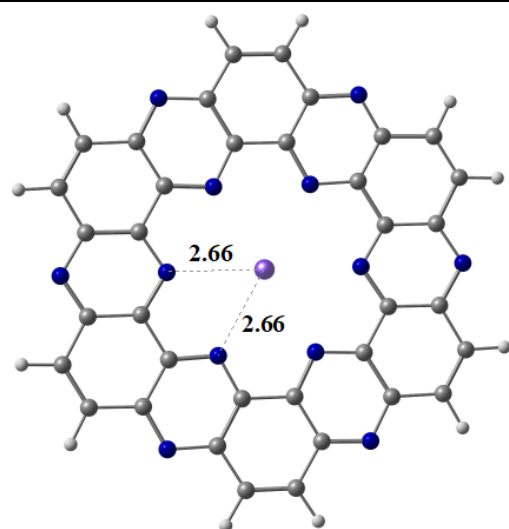

Quintet

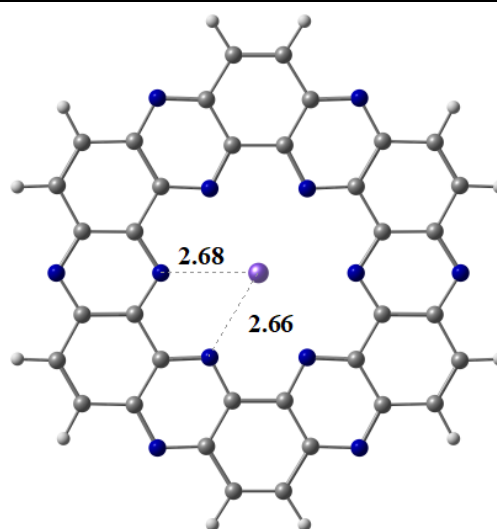

Septet

Ni@C<sub>2</sub>N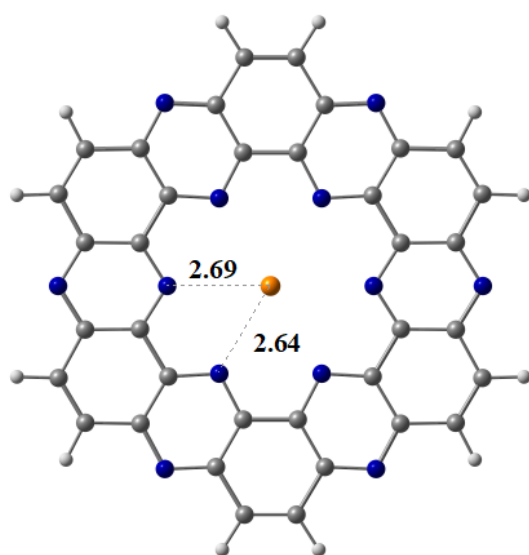

Singlet

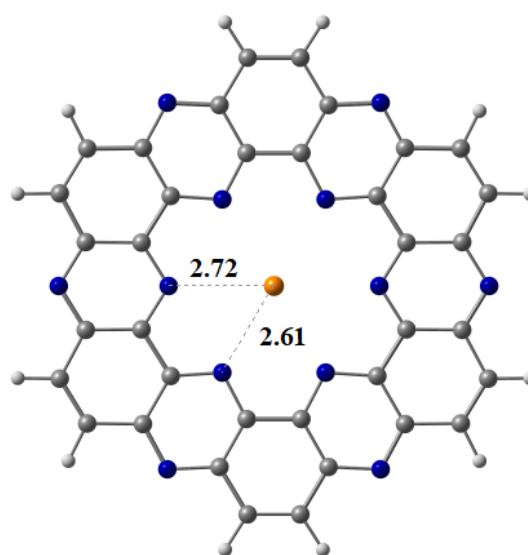

Triplet

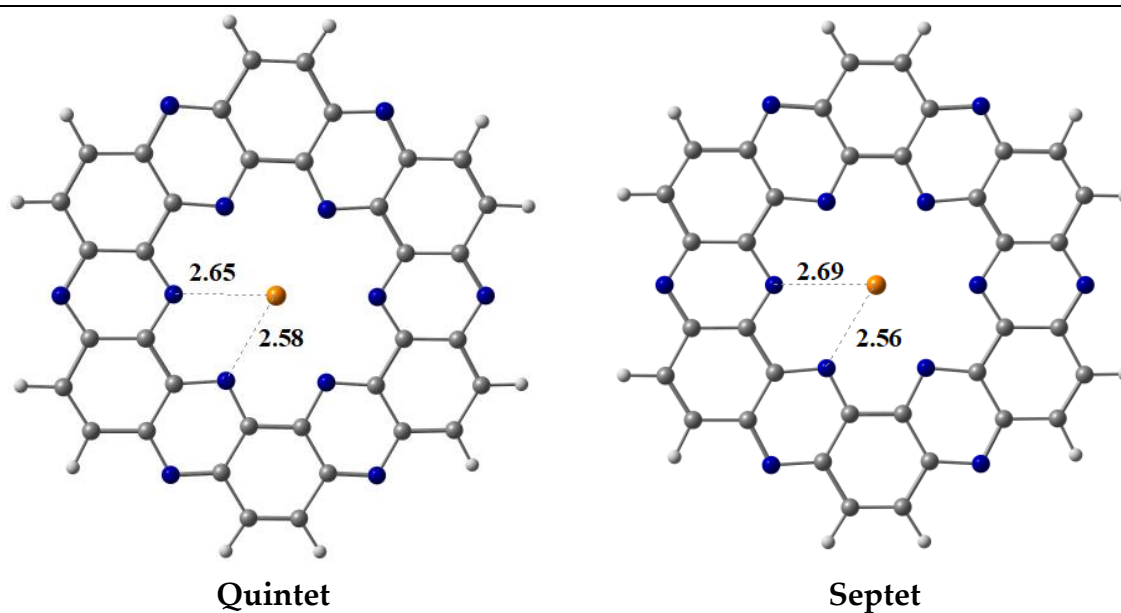

**Figure S1.** Optimized geometries of studied M@C<sub>2</sub>N complexes at various possible spin states at M06-2X/6-31G(d,p) level of theory. Where grey color is for carbon, light grey for hydrogen, blue for nitrogen, orange for nickel, purple for iron and cobalt blue for cobalt atom.

**Table S1.** Relative stabilities of studied M@C<sub>2</sub>N complexes at various possible spin states (all values are in eV).

| M@C <sub>2</sub> N  | Doublet | Quartet     | Sextet  | Octet       |
|---------------------|---------|-------------|---------|-------------|
| Co@C <sub>2</sub> N | 0.00    | 0.35        | 0.63    | 4.48        |
| --                  | Singlet | Triplet     | Quintet | Septet      |
| Fe@C <sub>2</sub> N | 1.32    | 0.13        | 0.29    | <b>0.00</b> |
| Ni@C <sub>2</sub> N | 3.61    | <b>0.00</b> | 1.28    | 4.24        |

**Table S2.** Energies and lowest vibrational frequencies of reactants, products, and transition states over designed M@C<sub>2</sub>N catalysts.

| M@C <sub>2</sub> N  |          | Energies (au) | Frequency (cm <sup>-1</sup> ) |
|---------------------|----------|---------------|-------------------------------|
| Co@C <sub>2</sub> N | Reactant | -3419.17      | 27.96                         |
|                     | TS       | -3419.15      | -433.35                       |
|                     | Product  | -3419.18      | 32.87                         |
| Fe@C <sub>2</sub> N | Reactant | -3300.20      | 27.68                         |
|                     | TS       | -3300.19      | -1166.19                      |
|                     | Product  | -3300.20      | 34.83                         |
| Co@C <sub>2</sub> N | Reactant | -3544.71      | 31.58                         |
|                     | TS       | -3544.69      | -424.51                       |
|                     | Product  | -3544.70      | 32.97                         |

### Cartesian coordinates for designed catalysts

#### Co@C<sub>2</sub>N

O 2

C      0.00000000   4.74502300   1.42119000

C      0.00000000   3.50322000   -0.72018500

---

|   |            |             |             |
|---|------------|-------------|-------------|
| C | 0.00000000 | 5.96349200  | -0.68373500 |
| C | 0.00000000 | 2.39272500  | -5.50729300 |
| C | 0.00000000 | 3.60199900  | -3.38808300 |
| C | 0.00000000 | 1.12603100  | -3.37758100 |
| C | 0.00000000 | 1.13416400  | -4.81070100 |
| C | 0.00000000 | 2.36925400  | -2.66351900 |
| C | 0.00000000 | 3.56626000  | -4.83368700 |
| C | 0.00000000 | 5.96349200  | 0.68373500  |
| C | 0.00000000 | 4.74502300  | -1.42119000 |
| C | 0.00000000 | 3.50322000  | 0.72018500  |
| N | 0.00000000 | 4.77726900  | -2.77109500 |
| N | 0.00000000 | 2.32009500  | -1.32979300 |
| N | 0.00000000 | 0.00000000  | -2.66501200 |
| N | 0.00000000 | 2.32009500  | 1.32979300  |
| N | 0.00000000 | 0.00000000  | -5.51013400 |
| N | 0.00000000 | 4.77726900  | 2.77109500  |
| C | 0.00000000 | -2.36925400 | -2.66351900 |
| C | 0.00000000 | -3.56626000 | -4.83368700 |
| C | 0.00000000 | -1.13416400 | -4.81070100 |
| C | 0.00000000 | -1.12603100 | -3.37758100 |
| C | 0.00000000 | -2.39272500 | -5.50729300 |
| C | 0.00000000 | -3.60199900 | -3.38808300 |
| N | 0.00000000 | -4.77726900 | -2.77109500 |
| N | 0.00000000 | -2.32009500 | -1.32979300 |
| C | 0.00000000 | 2.36925400  | 2.66351900  |
| C | 0.00000000 | 3.56626000  | 4.83368700  |
| C | 0.00000000 | 1.13416400  | 4.81070100  |
| C | 0.00000000 | 1.12603100  | 3.37758100  |
| C | 0.00000000 | 2.39272500  | 5.50729300  |

---

|   |            |             |             |
|---|------------|-------------|-------------|
| C | 0.00000000 | 3.60199900  | 3.38808300  |
| N | 0.00000000 | 0.00000000  | 5.51013400  |
| N | 0.00000000 | 0.00000000  | 2.66501200  |
| C | 0.00000000 | -2.39272500 | 5.50729300  |
| C | 0.00000000 | -3.60199900 | 3.38808300  |
| C | 0.00000000 | -1.12603100 | 3.37758100  |
| C | 0.00000000 | -4.74502300 | -1.42119000 |
| C | 0.00000000 | -3.50322000 | 0.72018500  |
| C | 0.00000000 | -5.96349200 | 0.68373500  |
| C | 0.00000000 | -5.96349200 | -0.68373500 |
| C | 0.00000000 | -4.74502300 | 1.42119000  |
| C | 0.00000000 | -3.50322000 | -0.72018500 |
| C | 0.00000000 | -1.13416400 | 4.81070100  |
| C | 0.00000000 | -2.36925400 | 2.66351900  |
| C | 0.00000000 | -3.56626000 | 4.83368700  |
| N | 0.00000000 | -2.32009500 | 1.32979300  |
| N | 0.00000000 | -4.77726900 | 2.77109500  |
| H | 0.00000000 | -2.35073900 | -6.59096400 |
| H | 0.00000000 | -4.52401000 | -5.34156100 |
| H | 0.00000000 | 2.35073900  | -6.59096400 |
| H | 0.00000000 | 4.52401000  | -5.34156100 |
| H | 0.00000000 | 6.88468000  | -1.25537600 |
| H | 0.00000000 | 6.88468000  | 1.25537600  |
| H | 0.00000000 | 4.52401000  | 5.34156100  |
| H | 0.00000000 | 2.35073900  | 6.59096400  |
| H | 0.00000000 | -2.35073900 | 6.59096400  |
| H | 0.00000000 | -4.52401000 | 5.34156100  |
| H | 0.00000000 | -6.88468000 | 1.25537600  |
| H | 0.00000000 | -6.88468000 | -1.25537600 |

---

|    |            |            |            |
|----|------------|------------|------------|
| Co | 0.00000000 | 0.00000000 | 0.00000000 |
|----|------------|------------|------------|

Fe@C<sub>2</sub>N

0 7

|   |            |             |             |
|---|------------|-------------|-------------|
| C | 0.00000000 | 4.76780100  | 1.41851200  |
| C | 0.00000000 | 3.53415700  | -0.71605400 |
| C | 0.00000000 | 6.00401700  | -0.67723500 |
| C | 0.00000000 | 2.37920400  | -5.44020100 |
| C | 0.00000000 | 3.61816600  | -3.37473300 |
| C | 0.00000000 | 1.13130500  | -3.30656400 |
| C | 0.00000000 | 1.12825500  | -4.72166900 |
| C | 0.00000000 | 2.37829500  | -2.64588200 |
| C | 0.00000000 | 3.57589400  | -4.80762400 |
| C | 0.00000000 | 6.00401700  | 0.67723500  |
| C | 0.00000000 | 4.76780100  | -1.41851200 |
| C | 0.00000000 | 3.53415700  | 0.71605400  |
| N | 0.00000000 | 4.79524600  | -2.75681700 |
| N | 0.00000000 | 2.34630600  | -1.30753100 |
| N | 0.00000000 | 0.00000000  | -2.53273700 |
| N | 0.00000000 | 2.34630600  | 1.30753100  |
| N | 0.00000000 | 0.00000000  | -5.45030100 |
| N | 0.00000000 | 4.79524600  | 2.75681700  |
| C | 0.00000000 | -2.37829500 | -2.64588200 |
| C | 0.00000000 | -3.57589400 | -4.80762400 |
| C | 0.00000000 | -1.12825500 | -4.72166900 |
| C | 0.00000000 | -1.13130500 | -3.30656400 |
| C | 0.00000000 | -2.37920400 | -5.44020100 |
| C | 0.00000000 | -3.61816600 | -3.37473300 |
| N | 0.00000000 | -4.79524600 | -2.75681700 |
| N | 0.00000000 | -2.34630600 | -1.30753100 |

---

|   |            |             |             |
|---|------------|-------------|-------------|
| C | 0.00000000 | 2.37829500  | 2.64588200  |
| C | 0.00000000 | 3.57589400  | 4.80762400  |
| C | 0.00000000 | 1.12825500  | 4.72166900  |
| C | 0.00000000 | 1.13130500  | 3.30656400  |
| C | 0.00000000 | 2.37920400  | 5.44020100  |
| C | 0.00000000 | 3.61816600  | 3.37473300  |
| N | 0.00000000 | 0.00000000  | 5.45030100  |
| N | 0.00000000 | 0.00000000  | 2.53273700  |
| C | 0.00000000 | -2.37920400 | 5.44020100  |
| C | 0.00000000 | -3.61816600 | 3.37473300  |
| C | 0.00000000 | -1.13130500 | 3.30656400  |
| C | 0.00000000 | -4.76780100 | -1.41851200 |
| C | 0.00000000 | -3.53415700 | 0.71605400  |
| C | 0.00000000 | -6.00401700 | 0.67723500  |
| C | 0.00000000 | -6.00401700 | -0.67723500 |
| C | 0.00000000 | -4.76780100 | 1.41851200  |
| C | 0.00000000 | -3.53415700 | -0.71605400 |
| C | 0.00000000 | -1.12825500 | 4.72166900  |
| C | 0.00000000 | -2.37829500 | 2.64588200  |
| C | 0.00000000 | -3.57589400 | 4.80762400  |
| N | 0.00000000 | -2.34630600 | 1.30753100  |
| N | 0.00000000 | -4.79524600 | 2.75681700  |
| H | 0.00000000 | -2.30042700 | -6.52201000 |
| H | 0.00000000 | -4.52132800 | -5.33749400 |
| H | 0.00000000 | 2.30042700  | -6.52201000 |
| H | 0.00000000 | 4.52132800  | -5.33749400 |
| H | 0.00000000 | 6.92126400  | -1.25534200 |
| H | 0.00000000 | 6.92126400  | 1.25534200  |
| H | 0.00000000 | 4.52132800  | 5.33749400  |



---

|    |            |             |             |
|----|------------|-------------|-------------|
| H  | 0.00000000 | 2.30042700  | 6.52201000  |
| H  | 0.00000000 | -2.30042700 | 6.52201000  |
| H  | 0.00000000 | -4.52132800 | 5.33749400  |
| H  | 0.00000000 | -6.92126400 | 1.25534200  |
| H  | 0.00000000 | -6.92126400 | -1.25534200 |
| Fe | 0.00000000 | 0.00000000  | 0.00000000  |

**Ni@C<sub>2</sub>N**

O 3

|   |            |             |             |
|---|------------|-------------|-------------|
| C | 0.00000000 | 4.70459600  | 1.41706400  |
| C | 0.00000000 | 3.46662800  | -0.71055400 |
| C | 0.00000000 | 5.94499100  | -0.67510700 |
| C | 0.00000000 | 2.39863900  | -5.52369500 |
| C | 0.00000000 | 3.58146900  | -3.38667100 |
| C | 0.00000000 | 1.12213700  | -3.40908000 |
| C | 0.00000000 | 1.13641600  | -4.83857100 |
| C | 0.00000000 | 2.35318400  | -2.66565300 |
| C | 0.00000000 | 3.56300700  | -4.82488200 |
| C | 0.00000000 | 5.94499100  | 0.67510700  |
| C | 0.00000000 | 4.70459600  | -1.41706400 |
| C | 0.00000000 | 3.46662800  | 0.71055400  |
| N | 0.00000000 | 4.76073400  | -2.74770700 |
| N | 0.00000000 | 2.27564800  | -1.33879100 |
| N | 0.00000000 | 0.00000000  | -2.70543600 |
| N | 0.00000000 | 2.27564800  | 1.33879100  |
| N | 0.00000000 | 0.00000000  | -5.54014400 |
| N | 0.00000000 | 4.76073400  | 2.74770700  |
| C | 0.00000000 | -2.35318400 | -2.66565300 |
| C | 0.00000000 | -3.56300700 | -4.82488200 |
| C | 0.00000000 | -1.13641600 | -4.83857100 |

---

|   |            |             |             |
|---|------------|-------------|-------------|
| C | 0.00000000 | -1.12213700 | -3.40908000 |
| C | 0.00000000 | -2.39863900 | -5.52369500 |
| C | 0.00000000 | -3.58146900 | -3.38667100 |
| N | 0.00000000 | -4.76073400 | -2.74770700 |
| N | 0.00000000 | -2.27564800 | -1.33879100 |
| C | 0.00000000 | 2.35318400  | 2.66565300  |
| C | 0.00000000 | 3.56300700  | 4.82488200  |
| C | 0.00000000 | 1.13641600  | 4.83857100  |
| C | 0.00000000 | 1.12213700  | 3.40908000  |
| C | 0.00000000 | 2.39863900  | 5.52369500  |
| C | 0.00000000 | 3.58146900  | 3.38667100  |
| N | 0.00000000 | 0.00000000  | 5.54014400  |
| N | 0.00000000 | 0.00000000  | 2.70543600  |
| C | 0.00000000 | -2.39863900 | 5.52369500  |
| C | 0.00000000 | -3.58146900 | 3.38667100  |
| C | 0.00000000 | -1.12213700 | 3.40908000  |
| C | 0.00000000 | -4.70459600 | -1.41706400 |
| C | 0.00000000 | -3.46662800 | 0.71055400  |
| C | 0.00000000 | -5.94499100 | 0.67510700  |
| C | 0.00000000 | -5.94499100 | -0.67510700 |
| C | 0.00000000 | -4.70459600 | 1.41706400  |
| C | 0.00000000 | -3.46662800 | -0.71055400 |
| C | 0.00000000 | -1.13641600 | 4.83857100  |
| C | 0.00000000 | -2.35318400 | 2.66565300  |
| C | 0.00000000 | -3.56300700 | 4.82488200  |
| N | 0.00000000 | -2.27564800 | 1.33879100  |
| N | 0.00000000 | -4.76073400 | 2.74770700  |
| H | 0.00000000 | -2.37565200 | -6.60760000 |
| H | 0.00000000 | -4.52765100 | -5.32063400 |

---

|    |            |             |             |
|----|------------|-------------|-------------|
| H  | 0.00000000 | 2.37565200  | -6.60760000 |
| H  | 0.00000000 | 4.52765100  | -5.32063400 |
| H  | 0.00000000 | 6.86036100  | -1.25643100 |
| H  | 0.00000000 | 6.86036100  | 1.25643100  |
| H  | 0.00000000 | 4.52765100  | 5.32063400  |
| H  | 0.00000000 | 2.37565200  | 6.60760000  |
| H  | 0.00000000 | -2.37565200 | 6.60760000  |
| H  | 0.00000000 | -4.52765100 | 5.32063400  |
| H  | 0.00000000 | -6.86036100 | 1.25643100  |
| H  | 0.00000000 | -6.86036100 | -1.25643100 |
| Ni | 0.00000000 | 0.00000000  | 0.00000000  |

### Cartesian coordinates of all computed geometries for hydrogen dissociation reaction

Co@C<sub>2</sub>N

Reactant

0 2

|   |             |            |             |
|---|-------------|------------|-------------|
| C | -4.85717300 | 1.18926100 | -0.13640800 |
| C | -2.65243400 | 2.33455800 | -0.01017900 |
| C | -4.75868200 | 3.61450200 | -0.09479500 |
| C | 0.80089300  | 5.88556700 | 0.09831100  |
| C | -1.29033800 | 4.60731000 | 0.07019800  |
| C | 0.83204800  | 3.40687800 | 0.05201400  |
| C | 1.53891200  | 4.66237600 | 0.06247900  |
| C | -0.61035600 | 3.35968800 | 0.06865300  |
| C | -0.55251500 | 5.84157100 | 0.09929600  |
| C | -5.49928800 | 2.47988400 | -0.15414500 |
| C | -3.30984500 | 3.58852800 | -0.01948200 |
| C | -3.43749100 | 1.18266800 | -0.06261100 |
| N | -2.64004100 | 4.73242700 | 0.03515700  |
| N | -1.27929600 | 2.16159700 | 0.05746500  |

---

|   |             |             |             |
|---|-------------|-------------|-------------|
| N | 1.49870500  | 2.25550800  | 0.00823500  |
| N | -2.75643800 | 0.02512600  | -0.00695700 |
| N | 2.87584400  | 4.71960000  | 0.02831300  |
| N | -5.56583100 | 0.05476300  | -0.17341300 |
| C | 3.57015300  | 1.09634000  | -0.06099200 |
| C | 5.67366600  | 2.37480200  | -0.11266600 |
| C | 3.53137000  | 3.55990600  | -0.01619200 |
| C | 2.82291200  | 2.33196800  | -0.02221700 |
| C | 4.97903100  | 3.53794700  | -0.06569400 |
| C | 4.98993000  | 1.09953400  | -0.10811500 |
| N | 5.67960400  | -0.04794900 | -0.13573500 |
| N | 2.86763500  | -0.02200800 | -0.03885800 |
| C | -3.46255500 | -1.11942600 | -0.06075600 |
| C | -5.54387600 | -2.37474700 | -0.15134900 |
| C | -3.37663800 | -3.52473800 | -0.00909900 |
| C | -2.69830400 | -2.28637200 | -0.01051000 |
| C | -4.82262300 | -3.52426300 | -0.08363100 |
| C | -4.87836000 | -1.10044100 | -0.13704600 |
| N | -2.72443600 | -4.68533500 | 0.05278600  |
| N | -1.31871700 | -2.13526500 | 0.03129300  |
| C | -0.65663500 | -5.82809400 | 0.12058900  |
| C | 1.45438500  | -4.68367900 | 0.05597300  |
| C | -0.67047600 | -3.34711900 | 0.06459400  |
| C | 4.96833400  | -1.18286300 | -0.11699600 |
| C | 2.77633700  | -2.37475600 | -0.04008600 |
| C | 4.91061700  | -3.61912500 | -0.08452700 |
| C | 5.62834000  | -2.46978400 | -0.12833300 |
| C | 3.46351100  | -3.61427000 | -0.03343900 |
| C | 3.54806800  | -1.15370900 | -0.07120400 |

---

|    |             |             |             |
|----|-------------|-------------|-------------|
| C  | -1.37583200 | -4.58124500 | 0.08473800  |
| C  | 0.76711600  | -3.41624700 | 0.03896400  |
| C  | 0.69522900  | -5.89415300 | 0.10745500  |
| N  | 1.45285000  | -2.27415200 | -0.01013400 |
| N  | 2.78828800  | -4.76385100 | 0.01653800  |
| H  | 5.48032700  | 4.50016300  | -0.06494700 |
| H  | 6.75737000  | 2.35651400  | -0.15058100 |
| H  | 1.36028800  | 6.81358800  | 0.11275400  |
| H  | -1.15570000 | 6.74290800  | 0.11295700  |
| H  | -5.21620700 | 4.59777900  | -0.10481800 |
| H  | -6.58207200 | 2.50185700  | -0.21270600 |
| H  | -6.62693900 | -2.37824700 | -0.20795600 |
| H  | -5.29944100 | -4.49838900 | -0.08514800 |
| H  | -1.27411900 | -6.71939300 | 0.14747700  |
| H  | 1.23928300  | -6.83127000 | 0.12613700  |
| H  | 5.39294800  | -4.59106000 | -0.08631800 |
| H  | 6.71210900  | -2.47191500 | -0.16637600 |
| H  | 0.89262300  | 0.00088400  | 0.94782300  |
| H  | 0.37907800  | -0.01343200 | 1.51248000  |
| Co | -0.85893700 | -0.01862100 | 0.15813500  |

### Co@C<sub>2</sub>N

#### Transition state

0 2

|   |             |             |             |
|---|-------------|-------------|-------------|
| C | 4.79930000  | -1.14561600 | -0.01286900 |
| C | 2.65575000  | -2.35265700 | -0.01085300 |
| C | 4.78862200  | -3.58720200 | -0.02874400 |
| C | -0.73492400 | -5.94015000 | -0.02841800 |
| C | 1.35426600  | -4.68356500 | -0.03039700 |

---

|   |             |             |             |
|---|-------------|-------------|-------------|
| C | -0.79981200 | -3.46370800 | -0.03519700 |
| C | -1.48647100 | -4.71871200 | -0.02592300 |
| C | 0.65365200  | -3.43014800 | -0.02479200 |
| C | 0.62015000  | -5.92091900 | -0.03314500 |
| C | 5.47763300  | -2.41801800 | -0.02407700 |
| C | 3.34891600  | -3.59577800 | -0.02329500 |
| C | 3.39164900  | -1.15166300 | -0.00604300 |
| N | 2.69067300  | -4.75097300 | -0.02930400 |
| N | 1.30163000  | -2.25901800 | -0.00591500 |
| N | -1.43761800 | -2.31052100 | -0.04799300 |
| N | 2.66289700  | -0.00309900 | 0.00550400  |
| N | -2.82663900 | -4.77603300 | -0.02435700 |
| N | 5.52067600  | -0.00402400 | -0.01077500 |
| C | -3.48669600 | -1.14163100 | 0.01426800  |
| C | -5.58768600 | -2.41143200 | 0.00150800  |
| C | -3.48133600 | -3.61782500 | -0.01481000 |
| C | -2.77861500 | -2.36730200 | -0.01750100 |
| C | -4.91813100 | -3.59383500 | -0.00690000 |
| C | -4.90362300 | -1.13855000 | 0.00901500  |
| N | -5.62201800 | -0.00438100 | 0.01319800  |
| N | -2.76068900 | 0.00240900  | 0.04067300  |
| C | 3.39557900  | 1.14521200  | 0.00263700  |
| C | 5.48375000  | 2.40952300  | -0.00494700 |
| C | 3.35129200  | 3.58431200  | -0.00469800 |
| C | 2.65989600  | 2.34100000  | 0.00112600  |
| C | 4.79267300  | 3.57645000  | -0.00484900 |
| C | 4.80468700  | 1.13542300  | -0.00364400 |
| N | 2.69383300  | 4.73888800  | -0.01251900 |
| N | 1.30136800  | 2.24292800  | -0.00056100 |

---

|    |             |             |             |
|----|-------------|-------------|-------------|
| C  | 0.62513300  | 5.91075300  | -0.03013400 |
| C  | -1.48447700 | 4.71959800  | -0.03543400 |
| C  | 0.65507200  | 3.41922200  | -0.02423100 |
| C  | -4.90034200 | 1.14249000  | 0.00007700  |
| C  | -2.77588700 | 2.37218100  | -0.02891200 |
| C  | -4.91125700 | 3.59766000  | -0.02703600 |
| C  | -5.57961000 | 2.40786800  | -0.01636000 |
| C  | -3.48235000 | 3.62046300  | -0.03030000 |
| C  | -3.48593500 | 1.13588200  | 0.00658600  |
| C  | 1.35679100  | 4.66866700  | -0.02306000 |
| C  | -0.79496900 | 3.46323600  | -0.04292700 |
| C  | -0.72735000 | 5.94153800  | -0.03371100 |
| N  | -1.44150400 | 2.31368700  | -0.05776300 |
| N  | -2.81744100 | 4.78070300  | -0.03943000 |
| H  | -5.43392400 | -4.54779600 | -0.00844700 |
| H  | -6.67212500 | -2.37390900 | 0.00441200  |
| H  | -1.29902000 | -6.86642900 | -0.02790600 |
| H  | 1.21231800  | -6.82871800 | -0.03620400 |
| H  | 5.28533100  | -4.55091700 | -0.03814800 |
| H  | 6.56190800  | -2.39243400 | -0.02954600 |
| H  | 6.56800500  | 2.38495400  | -0.00832400 |
| H  | 5.28740800  | 4.54129900  | -0.00815800 |
| H  | 1.22424600  | 6.81428000  | -0.02922300 |
| H  | -1.28659700 | 6.87049900  | -0.03598800 |
| H  | -5.43056300 | 4.54926300  | -0.03271300 |
| H  | -6.66417600 | 2.37147900  | -0.01567900 |
| H  | -1.28166000 | 0.00712500  | 0.70850600  |
| H  | -0.61145000 | 0.01417600  | 1.22737400  |
| Co | 0.75229900  | 0.02728000  | 0.11491400  |

**Co@C<sub>2</sub>N****Product**

O 2

|   |             |             |             |
|---|-------------|-------------|-------------|
| C | -4.85247200 | 1.02865500  | -0.09731400 |
| C | -2.72748200 | 2.28198800  | -0.00433200 |
| C | -4.88359500 | 3.47519200  | -0.07777200 |
| C | 0.59297600  | 5.94664700  | 0.03207200  |
| C | -1.46298100 | 4.63105300  | 0.01512700  |
| C | 0.71710200  | 3.46246700  | -0.00143100 |
| C | 1.37601300  | 4.73628200  | 0.00922200  |
| C | -0.74054000 | 3.39839800  | 0.01873100  |
| C | -0.75587200 | 5.89038300  | 0.03070000  |
| C | -5.55143700 | 2.29361300  | -0.11446400 |
| C | -3.44319700 | 3.51476100  | -0.02688400 |
| C | -3.44553000 | 1.06816700  | -0.03585100 |
| N | -2.80293500 | 4.67783100  | -0.00438900 |
| N | -1.37166600 | 2.21533400  | 0.03107700  |
| N | 1.40141700  | 2.33271700  | -0.04548800 |
| N | -2.69764800 | -0.06353600 | -0.00691200 |
| N | 2.70731700  | 4.83798200  | -0.02613100 |
| N | -5.54052700 | -0.12816900 | -0.13531600 |
| C | 3.50122700  | 1.24797000  | -0.02294900 |
| C | 5.54675300  | 2.54738900  | -0.11922000 |
| C | 3.40744400  | 3.69951300  | -0.04586800 |
| C | 2.73681100  | 2.44120400  | -0.03669800 |
| C | 4.84214100  | 3.71239900  | -0.09265700 |
| C | 4.90253700  | 1.25785200  | -0.08397000 |
| N | 5.64910200  | 0.12450700  | -0.09565200 |



---

|   |             |             |             |
|---|-------------|-------------|-------------|
| N | 2.83997400  | 0.05956800  | 0.04771100  |
| C | -3.38758100 | -1.22804700 | -0.04858200 |
| C | -5.43194400 | -2.54896100 | -0.13995600 |
| C | -3.27631000 | -3.67576900 | -0.05158900 |
| C | -2.61354100 | -2.41452500 | -0.02242300 |
| C | -4.71303400 | -3.70259600 | -0.10912800 |
| C | -4.79201000 | -1.25779500 | -0.11004200 |
| N | -2.58163700 | -4.81224400 | -0.02612300 |
| N | -1.26595300 | -2.29090300 | 0.01959200  |
| C | -0.48390300 | -5.93305700 | 0.02764800  |
| C | 1.59364900  | -4.67819700 | 0.02368300  |
| C | -0.58323300 | -3.43997900 | 0.01683500  |
| C | 4.95669000  | -1.04241200 | -0.07292900 |
| C | 2.84880200  | -2.32450300 | -0.01419700 |
| C | 5.00931800  | -3.49751400 | -0.06692800 |
| C | 5.65938400  | -2.30087300 | -0.09927200 |
| C | 3.57608200  | -3.55060700 | -0.02186300 |
| C | 3.55614900  | -1.09702000 | -0.00957300 |
| C | -1.25005600 | -4.70707900 | 0.00597400  |
| C | 0.87781000  | -3.43581600 | 0.01159900  |
| C | 0.86541600  | -5.92399900 | 0.03978200  |
| N | 1.50938100  | -2.27675300 | -0.02252500 |
| N | 2.92764000  | -4.72014500 | -0.00316600 |
| H | 5.33318200  | 4.67884500  | -0.10760200 |
| H | 6.63078000  | 2.54362000  | -0.15846800 |
| H | 1.13625000  | 6.88471400  | 0.04053100  |
| H | -1.37209800 | 6.78247000  | 0.03832000  |
| H | -5.40009800 | 4.42835100  | -0.09084800 |
| H | -6.63453300 | 2.25331200  | -0.15802400 |

---

|    |             |             |             |
|----|-------------|-------------|-------------|
| H  | -6.51569800 | -2.55640100 | -0.18603900 |
| H  | -5.18732300 | -4.67718700 | -0.12938400 |
| H  | -1.05675900 | -6.85356100 | 0.02974700  |
| H  | 1.45246400  | -6.83541900 | 0.05183800  |
| H  | 5.54498500  | -4.44000000 | -0.07786700 |
| H  | 6.74209800  | -2.24739800 | -0.13873500 |
| H  | 1.84774500  | 0.03814300  | 0.31588000  |
| H  | 0.40376800  | 0.06523100  | 1.39547300  |
| Co | -0.79168600 | 0.03669800  | 0.32642800  |

**Fe@C<sub>2</sub>N**

**Reactant**

07

|   |             |             |             |
|---|-------------|-------------|-------------|
| C | 1.36018200  | -4.63753400 | -0.00443400 |
| C | -0.76589100 | -3.44447200 | 0.00388700  |
| C | -0.72770500 | -5.92095900 | -0.01199400 |
| C | -5.60680300 | -2.41912500 | -0.04293100 |
| C | -3.45764900 | -3.58958300 | -0.01796100 |
| C | -3.50461600 | -1.12822300 | -0.01226000 |
| C | -4.92691500 | -1.14477700 | -0.03390600 |
| C | -2.74907800 | -2.35825800 | -0.00767200 |
| C | -4.90309600 | -3.57690200 | -0.03404800 |
| C | 0.62653100  | -5.87661600 | -0.01082700 |
| C | -1.47299500 | -4.69986600 | -0.00793900 |
| C | 0.66001400  | -3.40495100 | 0.01000900  |
| N | -2.80601200 | -4.75492300 | -0.01761900 |
| N | -1.42356200 | -2.27834200 | 0.00306200  |
| N | -2.81070900 | -0.00249200 | 0.00321900  |

---

|   |             |             |             |
|---|-------------|-------------|-------------|
| N | 1.30282100  | -2.19324400 | 0.02467100  |
| N | -5.62815100 | -0.00530900 | -0.04230900 |
| N | 2.70810900  | -4.73244800 | -0.01432100 |
| C | -2.75392900 | 2.35335100  | -0.00797500 |
| C | -4.91027300 | 3.56780600  | -0.03464100 |
| C | -4.92921800 | 1.13550500  | -0.03413900 |
| C | -3.50694200 | 1.12179200  | -0.01247100 |
| C | -5.61159700 | 2.40861500  | -0.04340900 |
| C | -3.46477000 | 3.58337700  | -0.01841100 |
| N | -2.81532600 | 4.74981900  | -0.01803600 |
| N | -1.42832900 | 2.27596700  | 0.00289600  |
| C | 2.67351600  | -2.32386300 | 0.00248100  |
| C | 4.80092300  | -3.55885800 | -0.03906100 |
| C | 4.86061500  | -1.13820700 | -0.03295300 |
| C | 3.43248100  | -1.14201000 | -0.00611700 |
| C | 5.52526900  | -2.40876700 | -0.04732500 |
| C | 3.35688600  | -3.56071800 | -0.01703600 |
| N | 5.55461200  | 0.00543800  | -0.04439000 |
| N | 2.73529400  | 0.00252600  | 0.00968400  |
| C | 5.52056400  | 2.41943400  | -0.04695400 |
| C | 3.34982000  | 3.56706400  | -0.01663300 |
| C | 3.43008200  | 1.14849000  | -0.00596600 |
| C | -1.48208000 | 4.69726300  | -0.00815600 |
| C | 0.65337400  | 3.40608600  | 0.01012700  |
| C | 0.61527900  | 5.87766200  | -0.01068500 |
| C | -0.73909200 | 5.91965500  | -0.01208200 |
| C | 1.35106800  | 4.63997400  | -0.00419400 |
| C | -0.77275500 | 3.44317700  | 0.00380200  |
| C | 4.85836100  | 1.14740100  | -0.03278000 |

---

|    |             |             |             |
|----|-------------|-------------|-------------|
| C  | 2.66882400  | 2.32878000  | 0.00274400  |
| C  | 4.79403600  | 3.56799500  | -0.03857200 |
| N  | 1.29832100  | 2.19558100  | 0.02483600  |
| N  | 2.69905700  | 4.73738800  | -0.01390400 |
| H  | -6.69554400 | 2.39076400  | -0.05755000 |
| H  | -5.40403600 | 4.53365700  | -0.04212900 |
| H  | -6.69077800 | -2.40346000 | -0.05699700 |
| H  | -5.39490400 | -4.54375200 | -0.04136900 |
| H  | -1.28473200 | -6.85054300 | -0.01843000 |
| H  | 1.22955400  | -6.77823000 | -0.01747400 |
| H  | 5.27741600  | -4.53299600 | -0.05039900 |
| H  | 6.60941400  | -2.40951300 | -0.06551000 |
| H  | 6.60470700  | 2.42225400  | -0.06510000 |
| H  | 5.26854400  | 4.54310700  | -0.04977400 |
| H  | 1.21671000  | 6.78034100  | -0.01723800 |
| H  | -1.29773100 | 6.84826400  | -0.01860700 |
| H  | -0.91276300 | 0.00307600  | 1.41698300  |
| H  | -0.32362400 | -0.00055500 | 1.88774300  |
| Fe | 0.63770600  | -0.00002200 | 0.05747000  |

Fe@C<sub>2</sub>N

Transition state

07

|   |             |             |             |
|---|-------------|-------------|-------------|
| C | 2.41374900  | -4.23958700 | 0.00711100  |
| C | 0.06208200  | -3.53798700 | 0.00564300  |
| C | 0.65724400  | -5.93651700 | -0.00528700 |
| C | -4.88039300 | -3.61399300 | -0.05780600 |
| C | -2.51986900 | -4.25824600 | -0.03815500 |
| C | -3.13222200 | -1.86163000 | -0.05679900 |

---

|   |             |             |             |
|---|-------------|-------------|-------------|
| C | -4.51671100 | -2.21299500 | -0.05658300 |
| C | -2.10792500 | -2.89049700 | -0.04106000 |
| C | -3.93339900 | -4.57835000 | -0.04980700 |
| C | 1.97523900  | -5.60426800 | -0.00136600 |
| C | -0.33926900 | -4.90974700 | -0.00717700 |
| C | 1.45662000  | -3.20099500 | 0.02417500  |
| N | -1.63542100 | -5.25056600 | -0.02420600 |
| N | -0.82721700 | -2.53472800 | -0.01283000 |
| N | -2.73339300 | -0.60584300 | -0.05733500 |
| N | 1.80993300  | -1.89412400 | 0.04448500  |
| N | -5.47080500 | -1.28375500 | -0.06674400 |
| N | 3.75615300  | -3.99854400 | -0.00539400 |
| C | -3.25195000 | 1.68726400  | 0.03065800  |
| C | -5.59691500 | 2.36777600  | -0.05555200 |
| C | -5.07402600 | 0.00067900  | -0.04702000 |
| C | -3.68503100 | 0.32415100  | -0.02176700 |
| C | -6.02424900 | 1.07021400  | -0.06377400 |
| C | -4.20766200 | 2.71700100  | -0.01146000 |
| N | -3.82961500 | 4.02840400  | -0.00214700 |
| N | -1.92995400 | 1.92152300  | 0.11174000  |
| C | 3.16070900  | -1.67027800 | 0.01424000  |
| C | 5.52267200  | -2.36845000 | -0.04321300 |
| C | 4.97359200  | 0.00782700  | -0.04624100 |
| C | 3.58689400  | -0.33827300 | -0.00251300 |
| C | 5.93249400  | -1.07974900 | -0.06100300 |
| C | 4.11326100  | -2.72425500 | -0.01083200 |
| N | 5.37840300  | 1.26511000  | -0.07342200 |
| N | 2.62669600  | 0.60950300  | 0.01751200  |
| C | 4.78735700  | 3.60501700  | -0.09571600 |

---

|    |             |             |             |
|----|-------------|-------------|-------------|
| C  | 2.43921900  | 4.25435800  | -0.05004000 |
| C  | 3.04066500  | 1.88813400  | -0.01948900 |
| C  | -2.52656900 | 4.26444200  | 0.01601500  |
| C  | -0.16283100 | 3.51495500  | 0.03357200  |
| C  | -0.75248700 | 5.93512100  | -0.02161300 |
| C  | -2.06844300 | 5.64012100  | -0.01154600 |
| C  | 0.25720400  | 4.89378500  | -0.01011700 |
| C  | -1.54031800 | 3.22602300  | 0.06614400  |
| C  | 4.41521900  | 2.22402300  | -0.06388500 |
| C  | 2.03245400  | 2.90105200  | -0.01403600 |
| C  | 3.83387100  | 4.57832700  | -0.08870400 |
| N  | 0.74477300  | 2.50097400  | 0.02406600  |
| N  | 1.52527900  | 5.25569600  | -0.04994700 |
| H  | -7.07673100 | 0.81244900  | -0.08720500 |
| H  | -6.30255600 | 3.19194600  | -0.07717000 |
| H  | -5.93962300 | -3.84714100 | -0.06396800 |
| H  | -4.18726200 | -5.63278700 | -0.04916000 |
| H  | 0.31545000  | -6.96491400 | -0.01197300 |
| H  | 2.75444400  | -6.35913600 | -0.00729300 |
| H  | 6.22611100  | -3.19398600 | -0.05625900 |
| H  | 6.98249400  | -0.80961400 | -0.08870000 |
| H  | 5.84638900  | 3.83479500  | -0.12528000 |
| H  | 4.09073400  | 5.63163000  | -0.11264800 |
| H  | -0.38736700 | 6.95605200  | -0.04824200 |
| H  | -2.83493600 | 6.40739100  | -0.03245200 |
| H  | -1.12332800 | 0.97599600  | 0.77402900  |
| H  | -0.64426800 | 0.40121800  | 1.33036400  |
| Fe | 0.62826900  | -0.07485300 | 0.17098200  |

**Fe@C<sub>2</sub>N**

---

**Product**

07

|   |             |             |             |
|---|-------------|-------------|-------------|
| C | -4.29945100 | 2.42307400  | -0.08087000 |
| C | -1.90778400 | 3.01528100  | 0.01258100  |
| C | -3.63089700 | 4.77446800  | -0.08708600 |
| C | 2.32554800  | 5.55986700  | -0.02377100 |
| C | -0.03152600 | 4.91992400  | -0.00816500 |
| C | 1.71662800  | 3.15007600  | -0.00834500 |
| C | 2.72335600  | 4.16946600  | -0.02978600 |
| C | 0.30554500  | 3.52722700  | 0.00961100  |
| C | 1.02266700  | 5.91347300  | -0.01416900 |
| C | -4.60587100 | 3.82163000  | -0.11615700 |
| C | -2.25081400 | 4.39795800  | -0.03112700 |
| C | -2.94955500 | 2.02805100  | 0.00261400  |
| N | -1.29392100 | 5.33787900  | -0.02778500 |
| N | -0.63487700 | 2.58770800  | 0.03622800  |
| N | 2.03019100  | 1.86879900  | -0.01758200 |
| N | -2.58719400 | 0.73478600  | 0.05489000  |
| N | 4.02219300  | 3.87071400  | -0.07798300 |
| N | -5.31533800 | 1.50801500  | -0.12898800 |
| C | 3.70670800  | 0.20339300  | 0.01195600  |
| C | 6.04256500  | 0.82710100  | -0.16778900 |
| C | 4.35200900  | 2.57178700  | -0.07742100 |
| C | 3.33749700  | 1.57187100  | -0.02130000 |
| C | 5.72115200  | 2.15205900  | -0.15146900 |
| C | 5.04312000  | -0.20732100 | -0.08998100 |
| N | 5.40690900  | -1.51585100 | -0.10450100 |
| N | 2.72204600  | -0.73020300 | 0.12869500  |

---

|   |             |             |             |
|---|-------------|-------------|-------------|
| C | -3.59726300 | -0.17582700 | -0.01538900 |
| C | -5.96322500 | -0.81457800 | -0.17357000 |
| C | -4.23909600 | -2.54632200 | -0.09019400 |
| C | -3.23647900 | -1.53097500 | -0.00950400 |
| C | -5.62502600 | -2.12495500 | -0.16542100 |
| C | -4.95711700 | 0.23194700  | -0.10613700 |
| N | -3.92739600 | -3.82954200 | -0.09787300 |
| N | -1.91354700 | -1.83560900 | 0.06076900  |
| C | -2.23193000 | -5.52931200 | -0.06899100 |
| C | 0.11966000  | -4.93280400 | -0.00996300 |
| C | -1.60534100 | -3.14201700 | 0.02112800  |
| C | 4.39694700  | -2.41726800 | -0.05964300 |
| C | 1.99699500  | -3.01425400 | 0.03744500  |
| C | 3.72656900  | -4.77403900 | -0.08715600 |
| C | 4.70020600  | -3.82721600 | -0.11477000 |
| C | 2.33859800  | -4.40336100 | -0.02011100 |
| C | 3.04406500  | -2.05364200 | 0.04896900  |
| C | -2.60735800 | -4.14062200 | -0.04796600 |
| C | -0.21084000 | -3.54188800 | 0.03038600  |
| C | -0.93248800 | -5.91364700 | -0.04700900 |
| N | 0.72214500  | -2.59379800 | 0.05016600  |
| N | 1.39355600  | -5.34328600 | -0.03746800 |
| H | 6.48049900  | 2.92437900  | -0.19960900 |
| H | 7.07412900  | 0.49795100  | -0.23289500 |
| H | 3.12241300  | 6.29538100  | -0.03512500 |
| H | 0.70581800  | 6.95037800  | -0.01692400 |
| H | -3.85851100 | 5.83363000  | -0.11358800 |
| H | -5.65605600 | 4.08844600  | -0.16936900 |
| H | -6.99692100 | -0.49170100 | -0.23485200 |



---

|    |             |             |             |
|----|-------------|-------------|-------------|
| H  | -6.37117100 | -2.91016900 | -0.21944700 |
| H  | -3.04263000 | -6.24853200 | -0.10850900 |
| H  | -0.63539100 | -6.95579000 | -0.06783300 |
| H  | 3.95381700  | -5.83334500 | -0.12705700 |
| H  | 5.74992600  | -4.09247600 | -0.17924100 |
| H  | 1.79876300  | -0.44084900 | 0.48433700  |
| H  | 0.55752100  | -0.04139700 | 1.55154800  |
| Fe | -0.68008600 | -0.03864600 | 0.43423200  |

**Ni@C<sub>2</sub>N**

**Reactant**

0 3

|   |             |             |             |
|---|-------------|-------------|-------------|
| C | 4.92262800  | -0.57466300 | -0.02952800 |
| C | 2.92792500  | -2.01507600 | 0.02864000  |
| C | 5.16908900  | -2.99189100 | 0.00398800  |
| C | -0.06889000 | -5.96442100 | -0.00923500 |
| C | 1.87249100  | -4.46312400 | 0.02602300  |
| C | -0.37866100 | -3.50732700 | 0.00466900  |
| C | -0.94566800 | -4.83227500 | -0.01620400 |
| C | 1.03505700  | -3.31540400 | 0.03019900  |
| C | 1.27301100  | -5.77384400 | 0.01121400  |
| C | 5.73854700  | -1.75428700 | -0.02141800 |
| C | 3.74065300  | -3.16799900 | 0.02407500  |
| C | 3.52299300  | -0.75610500 | -0.00409700 |
| N | 3.22044400  | -4.40724800 | 0.03274600  |
| N | 1.54334100  | -2.04763800 | 0.05425100  |
| N | -1.16077200 | -2.41869600 | -0.00552700 |
| N | 2.65581400  | 0.30381200  | -0.02556400 |
| N | -2.26371900 | -5.02884700 | -0.03980800 |

---

|   |             |             |             |
|---|-------------|-------------|-------------|
| N | 5.48550000  | 0.65416700  | -0.06008200 |
| C | -3.36106000 | -1.49398400 | -0.03631600 |
| C | -5.30706400 | -3.01569200 | -0.06760400 |
| C | -3.03938600 | -3.93881000 | -0.04632000 |
| C | -2.47103500 | -2.63688000 | -0.03203100 |
| C | -4.47585400 | -4.08681000 | -0.06637900 |
| C | -4.77613700 | -1.67415000 | -0.04972700 |
| N | -5.60481400 | -0.62259700 | -0.04441300 |
| N | -2.80430400 | -0.29527800 | -0.02076500 |
| C | 3.22854600  | 1.52835200  | -0.03969400 |
| C | 5.15920900  | 3.03906300  | -0.07739500 |
| C | 2.90377100  | 3.95762700  | -0.04078200 |
| C | 2.35629000  | 2.63313700  | -0.02808300 |
| C | 4.33934600  | 4.11704300  | -0.06800400 |
| C | 4.63851300  | 1.69015200  | -0.06016700 |
| N | 2.12540100  | 5.02698800  | -0.02612400 |
| N | 1.02260500  | 2.38701600  | -0.00213100 |
| C | -0.07193600 | 5.94996800  | 0.00897200  |
| C | -2.02561600 | 4.52827500  | 0.02161300  |
| C | 0.25107000  | 3.48900200  | 0.00740700  |
| C | -5.04111900 | 0.59046000  | -0.02314700 |
| C | -3.03624700 | 2.05652100  | 0.00938500  |
| C | -5.31389500 | 3.01609200  | 0.00152600  |
| C | -5.86650900 | 1.77964900  | -0.01497700 |
| C | -3.87772900 | 3.20044900  | 0.01147800  |
| C | -3.63017000 | 0.74023600  | -0.01096300 |
| C | 0.79639800  | 4.80183200  | -0.00232900 |
| C | -1.19360400 | 3.36296900  | 0.02009000  |
| C | -1.42080100 | 5.83098100  | 0.02095700  |

---

|    |             |             |             |
|----|-------------|-------------|-------------|
| N  | -1.71083200 | 2.14139400  | 0.02062200  |
| N  | -3.36101700 | 4.43026800  | 0.02152600  |
| H  | -4.85666700 | -5.10260900 | -0.07878800 |
| H  | -6.38577300 | -3.12323500 | -0.08018400 |
| H  | -0.51999000 | -6.94980300 | -0.02201000 |
| H  | 1.96786000  | -6.60698000 | 0.01390800  |
| H  | 5.76880900  | -3.89556400 | 0.00571900  |
| H  | 6.81432200  | -1.61825900 | -0.03841800 |
| H  | 6.23901800  | 3.14199200  | -0.09574300 |
| H  | 4.71768800  | 5.13284400  | -0.07803400 |
| H  | 0.41860100  | 6.91732600  | 0.00374800  |
| H  | -2.08248400 | 6.68929600  | 0.02596700  |
| H  | -5.92176400 | 3.91429300  | 0.00560000  |
| H  | -6.94121000 | 1.63363100  | -0.02450400 |
| H  | -0.45362300 | 0.30209300  | 1.42209500  |
| H  | -0.34837500 | -0.44175100 | 1.51310700  |
| Ni | 0.78946900  | -0.10539600 | 0.04212100  |

Ni@C<sub>2</sub>N

Transition state

0 3

|   |             |            |             |
|---|-------------|------------|-------------|
| C | -4.88368200 | 0.62319600 | 0.04563800  |
| C | -2.89242700 | 2.06201800 | 0.00764300  |
| C | -5.14792700 | 3.05265700 | 0.02073300  |
| C | 0.09830900  | 5.98208700 | -0.10353800 |
| C | -1.85214300 | 4.52428400 | -0.06499100 |
| C | 0.41833000  | 3.52919100 | -0.07249400 |
| C | 0.97048600  | 4.84724800 | -0.08328800 |
| C | -1.02247200 | 3.35477300 | -0.05683900 |
| C | -1.25088200 | 5.82765700 | -0.09591600 |

---

|   |             |             |             |
|---|-------------|-------------|-------------|
| C | -5.70022900 | 1.81446300  | 0.04352100  |
| C | -3.71699200 | 3.22322600  | -0.00294500 |
| C | -3.48342500 | 0.78317600  | 0.03796700  |
| N | -3.19107700 | 4.44239200  | -0.04004000 |
| N | -1.54016200 | 2.12246400  | -0.02129900 |
| N | 1.16660500  | 2.44198600  | -0.05844500 |
| N | -2.62802100 | -0.27668400 | 0.04528100  |
| N | 2.30187500  | 5.03964100  | -0.07860900 |
| N | -5.47283100 | -0.58652100 | 0.04919900  |
| C | 3.33095400  | 1.49519900  | 0.04502900  |
| C | 5.29138400  | 2.98229000  | 0.01244800  |
| C | 3.06569800  | 3.95503200  | -0.04112900 |
| C | 2.49740800  | 2.63575000  | -0.01918500 |
| C | 4.49975300  | 4.08296000  | -0.02469000 |
| C | 4.74413900  | 1.64278000  | 0.04053000  |
| N | 5.57766700  | 0.59737500  | 0.06076800  |
| N | 2.73503300  | 0.27781700  | 0.09402500  |
| C | -3.23202100 | -1.49755100 | 0.01957700  |
| C | -5.17897300 | -2.97747200 | 0.00983000  |
| C | -2.94326500 | -3.92905700 | -0.03603300 |
| C | -2.37941500 | -2.62161700 | -0.01895900 |
| C | -4.37590100 | -4.06972300 | -0.02047200 |
| C | -4.63336400 | -1.64186300 | 0.02804000  |
| N | -2.17096900 | -5.01317500 | -0.06870400 |
| N | -1.04418700 | -2.39585000 | -0.03975700 |
| C | 0.01253600  | -5.96763000 | -0.09986600 |
| C | 1.98333100  | -4.55164400 | -0.06378300 |
| C | -0.28345000 | -3.49549200 | -0.06456500 |
| C | 4.98535300  | -0.62467600 | 0.05115500  |

---

|    |             |             |             |
|----|-------------|-------------|-------------|
| C  | 3.00973900  | -2.07819900 | 0.00688900  |
| C  | 5.26603200  | -3.06256500 | 0.00844200  |
| C  | 5.79936300  | -1.80618200 | 0.03287900  |
| C  | 3.84844000  | -3.24039500 | -0.00859900 |
| C  | 3.57930100  | -0.76843900 | 0.05877200  |
| C  | -0.84982900 | -4.81041300 | -0.07853100 |
| C  | 1.16259300  | -3.37899000 | -0.06145700 |
| C  | 1.35965800  | -5.84988100 | -0.09163300 |
| N  | 1.67854200  | -2.16515000 | -0.03849400 |
| N  | 3.31393000  | -4.46794700 | -0.04626000 |
| H  | 4.90867200  | 5.08714200  | -0.04372400 |
| H  | 6.37358800  | 3.05941000  | 0.02065100  |
| H  | 0.56413000  | 6.96132200  | -0.12144300 |
| H  | -1.92958400 | 6.67256600  | -0.10612100 |
| H  | -5.75031000 | 3.95402700  | 0.01454200  |
| H  | -6.77462100 | 1.66698200  | 0.05597400  |
| H  | -6.26024900 | -3.06071700 | 0.01948400  |
| H  | -4.77143400 | -5.07896300 | -0.03544000 |
| H  | -0.48293300 | -6.93182500 | -0.11660600 |
| H  | 2.01599400  | -6.71297300 | -0.10228100 |
| H  | 5.88612400  | -3.95147300 | -0.00296000 |
| H  | 6.87332700  | -1.65095500 | 0.03880300  |
| H  | 1.22998200  | 0.12329200  | 0.79247700  |
| H  | 0.56518400  | 0.05453800  | 1.30063900  |
| Ni | -0.71825600 | -0.02085700 | 0.11147400  |

Ni@C<sub>2</sub>N

Product

03

|   |             |             |             |
|---|-------------|-------------|-------------|
| C | -3.35781500 | -3.59638600 | -0.03923000 |
|---|-------------|-------------|-------------|

---

|   |             |             |             |
|---|-------------|-------------|-------------|
| C | -3.41275500 | -1.14746100 | -0.03149500 |
| C | -5.48946700 | -2.42158800 | -0.12781500 |
| C | -4.79794500 | 3.58855900  | -0.09410300 |
| C | -4.81914300 | 1.14236200  | -0.09901800 |
| C | -2.66787300 | 2.34881200  | -0.01260900 |
| C | -3.35853600 | 3.59564100  | -0.03937900 |
| C | -3.41303800 | 1.14676700  | -0.03159600 |
| C | -5.49014500 | 2.42044900  | -0.12794500 |
| C | -4.79706800 | -3.58969200 | -0.09394000 |
| C | -4.81872900 | -1.14356200 | -0.09896700 |
| C | -2.66737000 | -2.34957100 | -0.01242500 |
| N | -5.53736100 | -0.00052600 | -0.12845200 |
| N | -2.69523100 | -0.00029800 | 0.02884400  |
| N | -1.31702600 | 2.25497000  | 0.01378200  |
| N | -1.31653500 | -2.25548000 | 0.01394800  |
| N | -2.69260300 | 4.74635400  | -0.02174500 |
| N | -2.69146900 | -4.74708900 | -0.02164800 |
| C | 0.79804800  | 3.45128400  | -0.00357200 |
| C | 0.73026200  | 5.93797200  | 0.02283100  |
| C | -1.35587400 | 4.67144800  | 0.00257700  |
| C | -0.66147300 | 3.42195100  | 0.00886600  |
| C | -0.61940300 | 5.91453400  | 0.01686700  |
| C | 1.48588000  | 4.70949700  | 0.00686900  |
| N | 2.81914100  | 4.78094600  | -0.01991100 |
| N | 1.45597800  | 2.30608100  | -0.03798600 |
| C | -0.66072300 | -3.42213800 | 0.00886100  |
| C | -0.61814700 | -5.91486800 | 0.01672400  |
| C | 1.48684100  | -4.70919300 | 0.00676100  |
| C | 0.79880800  | -3.45119000 | -0.00358700 |

---

|   |             |             |             |
|---|-------------|-------------|-------------|
| C | 0.73150600  | -5.93787100 | 0.02262300  |
| C | -1.35500800 | -4.67195500 | 0.00256300  |
| N | 2.82017100  | -4.78038700 | -0.01995900 |
| N | 1.45646100  | -2.30581700 | -0.03794800 |
| C | 4.92858700  | -3.60517300 | -0.07460400 |
| C | 4.93103700  | -1.14981100 | -0.07116000 |
| C | 2.79415600  | -2.38369300 | -0.02771500 |
| C | 3.49311900  | 3.62653300  | -0.03529700 |
| C | 3.52922500  | 1.17344100  | -0.01663200 |
| C | 5.60509100  | 2.42499500  | -0.09938700 |
| C | 4.92780200  | 3.60617500  | -0.07469100 |
| C | 4.93072400  | 1.15087600  | -0.07121900 |
| C | 2.79363300  | 2.38426300  | -0.02775100 |
| C | 3.49387100  | -3.62587300 | -0.03525600 |
| C | 3.52944900  | -1.17275100 | -0.01660600 |
| C | 5.60562800  | -2.42388800 | -0.09928400 |
| N | 2.83996900  | 0.00027500  | 0.04195400  |
| N | 5.65050100  | 0.00051700  | -0.08529200 |
| H | -1.21388900 | 6.82126000  | 0.02010100  |
| H | 1.29573800  | 6.86289700  | 0.03079100  |
| H | -5.29385400 | 4.55241800  | -0.11421200 |
| H | -6.57368100 | 2.40251200  | -0.17583700 |
| H | -6.57300400 | -2.40389000 | -0.17573800 |
| H | -5.29283800 | -4.55361300 | -0.11405600 |
| H | -1.21232300 | -6.82179300 | 0.01991100  |
| H | 1.29723200  | -6.86264900 | 0.03049700  |
| H | 5.44236600  | -4.55976400 | -0.08643500 |
| H | 6.68943100  | -2.39444400 | -0.13331200 |
| H | 6.68890000  | 2.39578100  | -0.13346100 |

---

|    |             |            |             |
|----|-------------|------------|-------------|
| H  | 5.44137800  | 4.56087100 | -0.08653900 |
| H  | 1.84378900  | 0.00018000 | 0.28799000  |
| H  | 0.36696400  | 0.00026600 | 1.38710600  |
| Ni | -0.78032500 | 0.00034900 | 0.33080500  |
